# Supplementary material
Source: PubMed Central journal article supplement (PMC5730054)
Supplement: NIHMS923309-supplement-table_S1.pdf [file NIHMS923309-supplement-table_S1.pdf]

**Table S1.** IGA description of erythema and pigmentation

| <b>IGA</b> | <b>ERYTHEMA</b>                                                             |
|------------|-----------------------------------------------------------------------------|
| 0          | Clear of erythema                                                           |
| 1          | Trace erythema                                                              |
| 2          | Visible, not confluent erythema, no sharp borders                           |
| 3          | Confluent erythema with 4 sharp borders                                     |
| 4          | Intense erythema                                                            |
|            |                                                                             |
| <b>IGA</b> | <b>HYPERPIGMENTATION</b>                                                    |
| 0          | Clear of hyperpigmentation                                                  |
| 1          | Almost clear of hyperpigmentation                                           |
| 2          | Mild but noticeable hyperpigmentation                                       |
| 3          | Moderate hyperpigmentation<br>(medium brown in quality)                     |
| 4          | Severe hyperpigmentation<br>(dark brown in quality)                         |
| 5          | Very severe hyperpigmentation<br>(very dark brown, almost black in quality) |

Abbreviations: IGA, investigator's global assessment
